# Supplementary material for: Perceived effectiveness and use of personal biomedical devices for noncommunicable disease self-management among adult university students in Costa Rica: a cross-sectional study
Source: Research Square preprint supplement (doi:10.21203/rs.3.rs-8389948/v1), 2026-01-22
Supplement: Supplementary file 1 [file 0d352b3b456977db642a2f42.docx]

**Supplementary File 1. Study Questionnaire (English Version)**

**Perceived effectiveness and use of personal biomedical devices for noncommunicable disease self-management among adult university students in Costa Rica: a cross-sectional study**

**Participant Information**

Dear participant,

This questionnaire is part of an academic research project conducted for the course *Professional Experience I* at the Latin American University of Science and Technology (ULACIT). The aim of this study is to assess the use, perceived effectiveness, and acceptance of personal biomedical technologies—such as glucometers, digital blood pressure monitors, and smart scales—in health self-care among adult university students.

Your participation is entirely voluntary and anonymous.

No personal identifying information will be collected, and all data will be used exclusively for educational and research purposes.

Estimated completion time: **5–10 minutes**.

**Informed Consent**

By continuing with this questionnaire, you confirm that:

- You have read and understood the information above.
- You agree to participate voluntarily.
- You are 18 years of age or older.
- You understand that you may withdraw at any time without consequences.

**Response options:**
☐ I agree  ☐ I do not agree

**Section 1: Sociodemographic Data**

1. **Age:** (open-ended)
2. **Sex:**
   ☐ Male
   ☐ Female
   ☐ Other
3. **Academic program:** (ULACIT degree programs)

 Bachelor of Science in Business Administration

 Bachelor’s Degree in International Relations

 Bachelor’s Degree in Business Administration

 Bachelor’s Degree in Digital Animation

 Bachelor’s Degree in Cybersecurity

 Bachelor’s Degree in Accounting

 Bachelor’s Degree in Law

 Bachelor’s Degree in Graphic Design and Visual Communication

 Bachelor’s Degree in Business Economics

 Bachelor’s Degree in English Teaching with an Emphasis on Preschool Education

 Bachelor’s Degree in English Teaching

 Bachelor’s Degree in Special Education with an Emphasis on Learning Disabilities

 Bachelor’s Degree in Electronic Circuits and Systems Engineering

 Bachelor’s Degree in Occupational and Environmental Safety Engineering

 Bachelor’s Degree in Industrial Engineering

 Bachelor’s Degree in Computer Engineering

 Bachelor’s Degree in Business Intelligence and Information Management

 Bachelor’s Degree in Psychology

 Bachelor’s Degree in Advertising with an Emphasis on Multimedia Production

 Bachelor’s Degree in Marketing and Digital Media

 Doctorate in Business and Economic Sciences

 Doctorate in Law

 Specialization in Notarial and Registry Law

 Specialization in Orthodontics and Functional Orthopedics

 Specialization in Video Game Design and Programming

 Licentiate Degree in Business Administration

 Licentiate Degree in Organizational Behavior

 Licentiate Degree in Public Accounting

 Licentiate Degree in Law with an Emphasis on Business Law

 Licentiate Degree in Law with an Emphasis on Criminal Law

 Licentiate Degree in Law with an Emphasis on Tax Law

 Licentiate Degree in Law

 Licentiate Degree in Business Economics

 Licentiate Degree in Finance

 Licentiate Degree in Biomedical Engineering

 Licentiate Degree in Industrial Engineering with an Emphasis on Supply Chain Management

 Licentiate Degree in Industrial Engineering with an Emphasis on Operations Management

 Licentiate Degree in Industrial Engineering with an Emphasis on Quality Engineering

 Licentiate Degree in Industrial Engineering with an Emphasis on Modern Manufacturing Systems

 Licentiate Degree in Computer Engineering with an Emphasis on Software Development

 Licentiate Degree in Computer Engineering with an Emphasis on Technology Resource Management

 Licentiate Degree in Computer Engineering with an Emphasis on Networks and Telematic Systems

 Licentiate Degree in Industrial Chemical Engineering

 Licentiate Degree in Educational Innovation

 Licentiate Degree in Marketing

 Licentiate Degree in International Business

 Licentiate Degree in Nutrition

 Licentiate Degree in Dentistry

 Licentiate Degree in Psychology

 Licentiate Degree in Occupational Health with an Emphasis on Industrial Safety

 Master’s Degree in Corporate Tax Advisory

 Master’s Degree in Curriculum and University Teaching

 Master’s Degree in Business Law

 Master’s Degree in English Teaching with a Concentration in Evaluation and Program Management

 Master’s Degree in Project Management

 Master’s Degree in Information Technology Engineering with a Concentration in Project Management

 Master’s Degree in Psychopedagogy

 Professional Master’s Degree in International and Strategic Marketing

 Other

1. **Have you been diagnosed with any of the following conditions?** *(You may select more than one)*
   ☐ Type 2 diabetes
   ☐ Arterial hypertension
   ☐ Obesity
   ☐ None

**Section 2: Use of Personal Biomedical Devices**

**Instructions:** The following questions refer to your experience with personal biomedical devices such as glucometers, digital blood pressure monitors, or smart/digital scales. Please select the option that best reflects your situation.

1. **Do you currently have any personal biomedical device at home (e.g., glucometer, digital blood pressure monitor, smart scale)?**
   ☐ Yes
   ☐ No → *(Skip to Question 31)*
2. **Which of the following personal devices do you currently use?** *(You may select more than one)*
   ☐ Digital glucometer
   ☐ Digital blood pressure monitor
   ☐ Digital or smart scale
   ☐ None
3. **How often do you use these devices?**
   ☐ Rarely (once a month or less)
   ☐ Occasionally (1–3 times per week)
   ☐ Frequently (4 or more times per week)
4. **For how long have you been using them regularly?**
   ☐ Less than 1 month
   ☐ Between 1 and 6 months
   ☐ More than 6 months
   ☐ I do not use them regularly
5. **How familiar do you feel using these devices?**
   ☐ Very low – I do not know how they work
   ☐ Low – I need help to use them
   ☐ Moderate – I use them with some autonomy
   ☐ High – I use them without difficulty
   ☐ Very high – I fully master their functions
6. **Do you use any mobile application or digital platform associated with the device?**
   ☐ Yes
   ☐ No
   ☐ Not sure

**Section 3: Perceived Effectiveness of Personal Biomedical Devices**

**Instructions:** Below are statements related to your experience using personal biomedical devices. Please indicate your level of agreement with each statement by selecting an option on a scale from 1 to 5, where:

1 = Strongly disagree
2 = Disagree
3 = Neither agree nor disagree
4 = Agree
5 = Strongly agree

1. The device has helped me achieve better control of my health.
2. I trust the accuracy of the data provided by the device.
3. I find the device useful for making decisions related to my well-being.
4. The device motivates me to maintain healthier habits.
5. Using the device is part of my personal self-care routine.
6. I believe the device has a positive impact on my quality of life.

**Section 4: Technology Acceptance (UTAUT2 Model)**

**Instructions:** Below are statements about your experience using personal biomedical technologies. Please indicate your level of agreement using the following scale:

1 = Strongly disagree
2 = Disagree
3 = Neither agree nor disagree
4 = Agree
5 = Strongly agree

**Performance Expectancy**

1. Using the device improves my ability to monitor my health.
2. I believe the device makes taking care of my health easier.

**Effort Expectancy**

1. Learning to use the device was easy for me.
2. Using the device does not require much effort.

**Facilitating Conditions**

1. I have the necessary resources to use the device.
2. I know where to seek help if I have problems using the device.

**Social Influence**

1. People close to me support the use of these devices.
2. I feel motivated to use them if I know other people also do.

**Hedonic Motivation and Perceived Value**

1. I enjoy using the device; it is a positive experience.
2. I feel that using the device is worthwhile because of what it provides.

**Habit**

1. Using the device has become part of my daily routine.
2. I use it almost automatically, without thinking much about it.

**Trust and Technology Anxiety**

1. I trust that the data generated by the device are accurate.
2. I feel nervous or insecure when using this type of technology.

**Section 5: Self-Care Practices**

**Instructions:** Below are statements related to your personal health habits and practices. Please select the option that best reflects your situation. Use the following scale:

1 = Never
2 = Rarely
3 = Sometimes
4 = Frequently
5 = Always

1. I regularly measure my blood pressure, weight, or blood glucose.
2. I consistently maintain a healthy diet.
3. I engage in physical activity at least three times per week.
4. I avoid unhealthy habits such as excessive consumption of sugar, fat, or salt.
5. I follow medical or monitoring recommendations if I have a chronic condition.
6. I feel responsible for actively monitoring my own health.
